# Supplementary material
Source: PubMed Central journal article supplement (PMC5951721)
Supplement: NIHMS966271-supplement-Hagermeyer_et_al_2017_SuppMat.pdf [file NIHMS966271-supplement-Hagermeyer_et_al_2017_SuppMat.pdf]

## Supplementary material

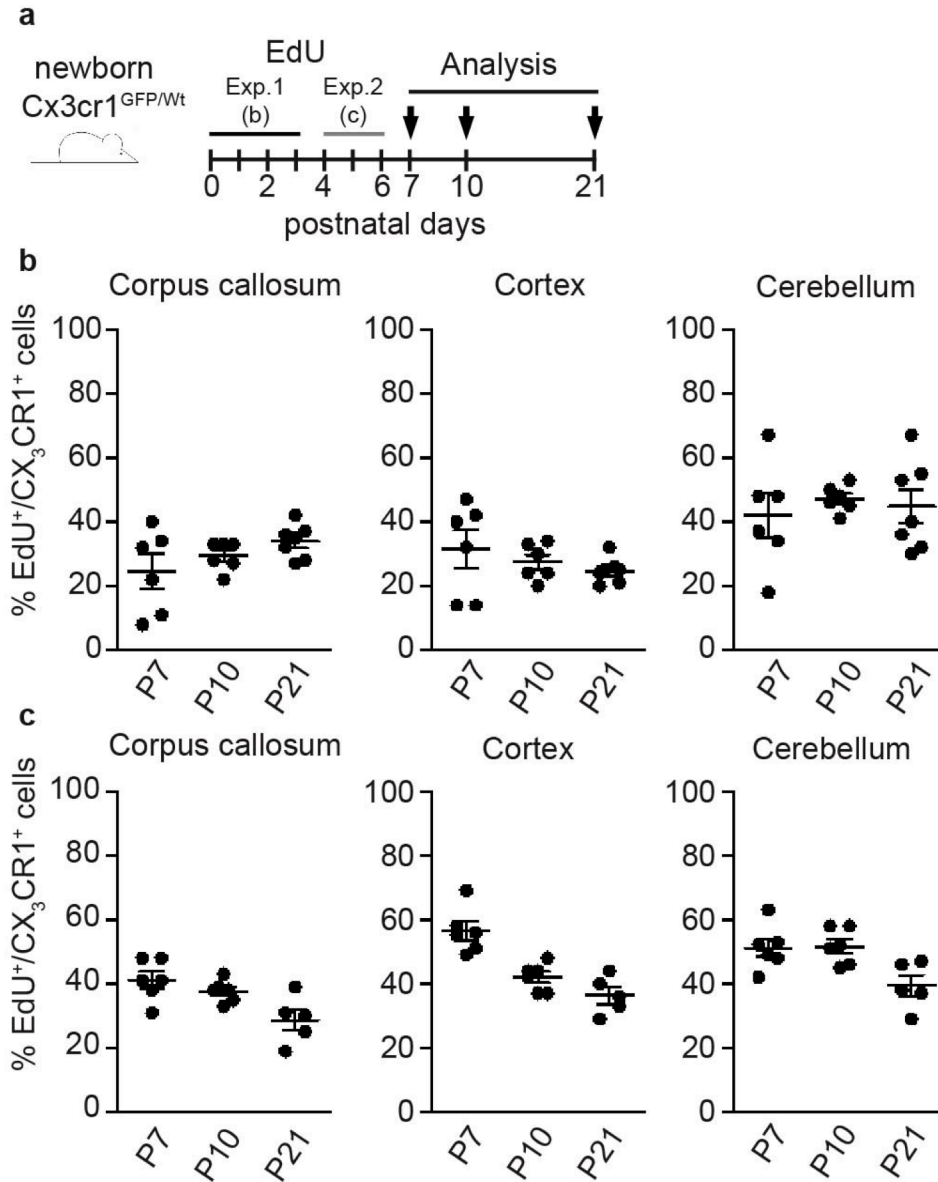

**Figure S1**

**Figure S1 (related to Fig. 1): High proliferation rate of postnatal microglia.** (a) Scheme of experimental setup. *Cx3cr1<sup>GFP/Wt</sup>* mice were intraperitoneally injected (i.p.) with 5-Ethynyl-2'-deoxyuridine (EdU) at P0-P3 or P4-P6. Analysis was performed on day P7, P10, and P21. (b) Quantification of EdU<sup>+</sup>/CX<sub>3</sub>CR1<sup>+</sup> microglia in the corpus callosum, cortex, and cerebellum at the indicated time points. EdU was applied at P0-P3. Each symbol represents one mouse. Mean ± SEM are shown. (c) Quantification of EdU<sup>+</sup>/CX<sub>3</sub>CR1<sup>+</sup> microglia in the corpus callosum, cortex, and cerebellum at the indicated time points. EdU was applied at P4-P6. Each symbol represents one mouse. Mean ± SEM are shown

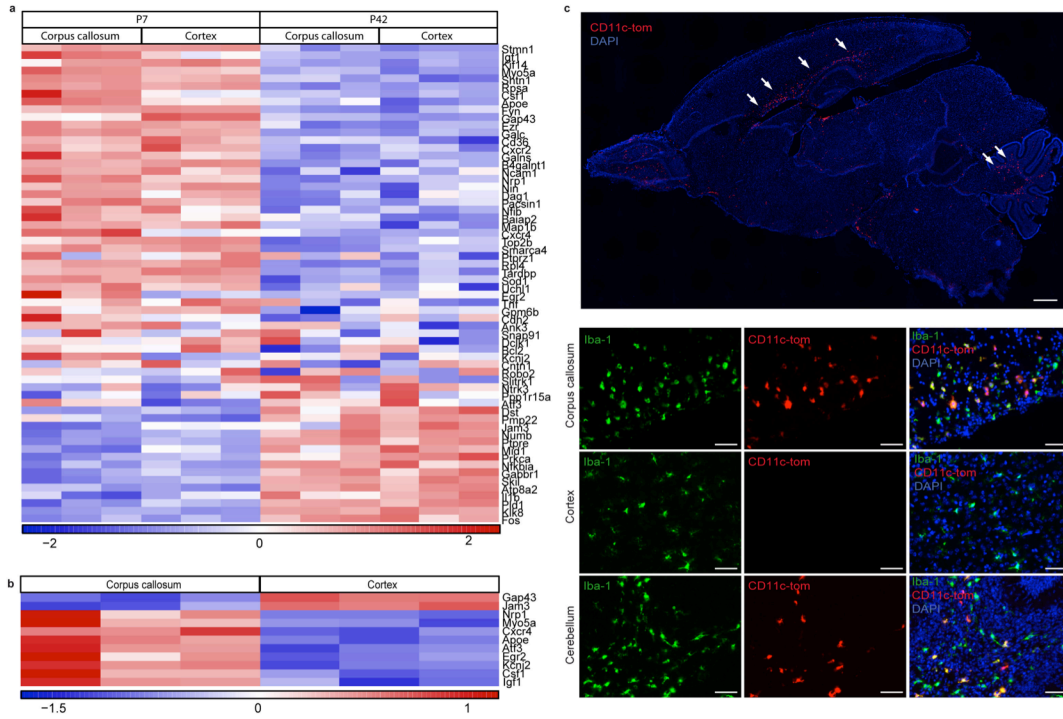

Figure S2

**Figure S2 (related to Fig. 1): Genes related to myelination and axogenesis are highly upregulated in the postnatal brain.** (a)(b) Hierarchical clustering created on the most significantly differentially expressed genes (cut off adjusted to p value < 0.01) related to the GO-terms myelination and axogenesis between microglia from the corpus callosum and cortex at postnatal day 7 and at P42 (adult) (a) or between microglia from the corpus callosum and cortex only at postnatal day 7 (b). Heat map displays row z-score values from red to blue via white. (c) Immunofluorescent images of a P8 *Cd11c<sup>CreER</sup>:R26-tomato* mouse injected with tamoxifen at P3-P7. Representation of the accumulation of CD11c<sup>+</sup> (red) Iba-1<sup>+</sup> microglia (green) specifically in white matter regions (corpus callosum and cerebellum; indicated by arrows). Scale bar = 200  $\mu$ m upper image, 50  $\mu$ m: lower images

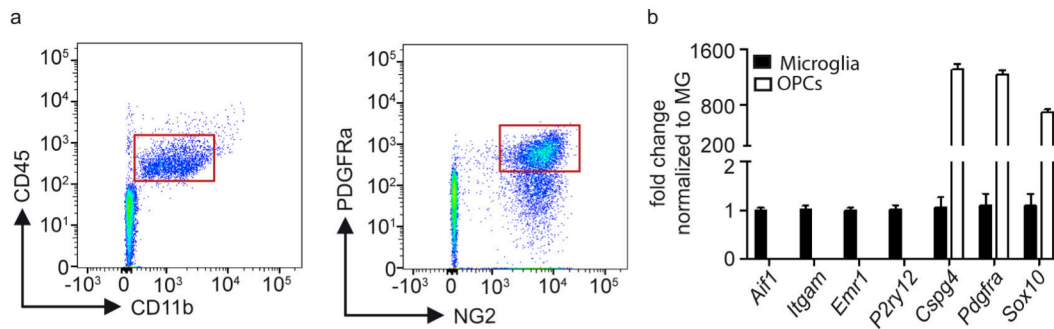

**Figure S3**

**Figure S3 (related to Fig. 3): Purity of sorted microglia and oligodendrocyte progenitors.** (a) Representative flow cytometry blots showing the sorting strategy for CD45<sup>+</sup>CD11b<sup>+</sup> microglia (left) and PDGFRα<sup>+</sup>NG2<sup>+</sup> oligodendrocyte progenitors (OPCs; right) used for the gene expression analysis in (b). Cells were pre-gated on living cells, single cells, and Gr-1<sup>-</sup> cells. (b) Quantitative RT-PCR of the genes *allograft inflammatory factor 1 (Aif1)*, *integrin subunit alpha M (Itgam)*, *adhesion G protein-coupled receptor E1 (Emr1)*, *purinergic receptor P2Y12 (p2ry12)*, *chondroitin sulfate proteoglycan 4 (Cspg4)*, *platelet derived growth factor receptor alpha (Pdgfra)*, and *SRY-Box 10 (Sox10)*. Data are normalized to *Gapdh* and  $\beta$ -Actin and presented normed to microglia. Bars represent mean  $\pm$  SEM

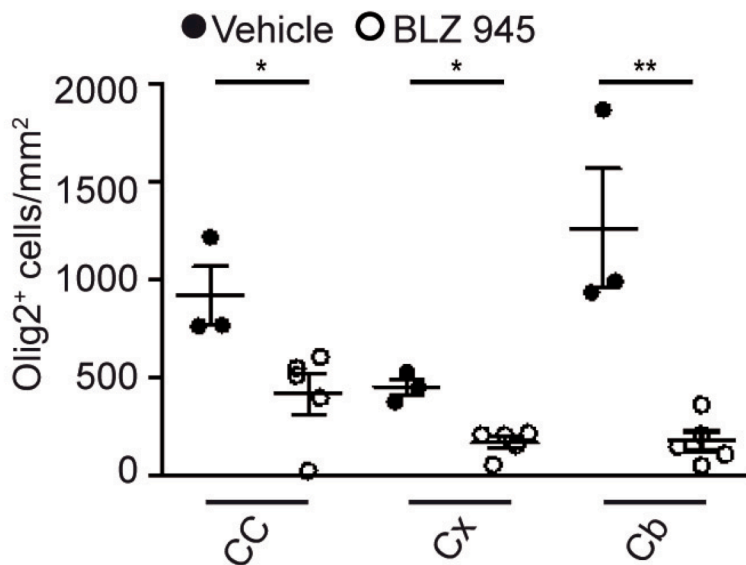

**Figure S4**

**Figure S4 (related to Fig. 3): Olig2<sup>+</sup> oligodendrocyte numbers upon microglia depletion.** Quantification of Olig2<sup>+</sup> oligodendrocytes in the corpus callosum, cortex, and cerebellum at P8, 1 day after BLZ945-induced depletion of microglia at P2, P4, P6, and P7. n = 3 - 5; samples from two independent experiments. Significant differences were examined by an unpaired *t* test and marked with asterisks (\**P* < 0.05, \*\**P* < 0.01)
